# Supplementary material for: Epigenetic mechanisms mediate the experimental evolution of resistance against parasitic fungi in the greater wax moth Galleria mellonella
Source: PubMed Central journal article supplement (PMC6367475; doi:10.1038/s41598-018-36829-8), 2019-02-07
Supplement: 41598_2018_36829_MOESM1_ESM.pdf [file 41598_2018_36829_MOESM1_ESM.pdf]

**Epigenetic mechanisms mediate the experimental evolution of resistance  
against parasitic fungi in the greater wax moth *Galleria mellonella***

**Krishnendu Mukherjee<sup>1#</sup>, Ivan Dubovskiy<sup>2#</sup>, Ekaterina Grizanova<sup>2</sup>, Rüdiger Lehmann<sup>1</sup>, Andreas  
Vilcinskas<sup>1,3\*</sup>**

<sup>1</sup>Fraunhofer Institute for Molecular Biology and Applied Ecology, Department of Bioresources,  
Winchester Str. 2, 35394 Giessen, Germany

<sup>2</sup>Novosibirsk State Agrarian University, Dobrolubova 160, 630039 Novosibirsk, Russia

<sup>3</sup>Institute for Insect Biotechnology, Justus-Liebig University of Giessen,  
Heinrich-Buff-Ring 26-32, 35392 Giessen, Germany

Tel: +49 641 99 37600

Fax: +49 641 99 37609

**\* Correspondence to [andrea.vilcinskas@agrar.uni-giessen.de](mailto:andrea.vilcinskas@agrar.uni-giessen.de)**

**#These authors contributed equally to this work.**

**Supplementary Figures, Methods**

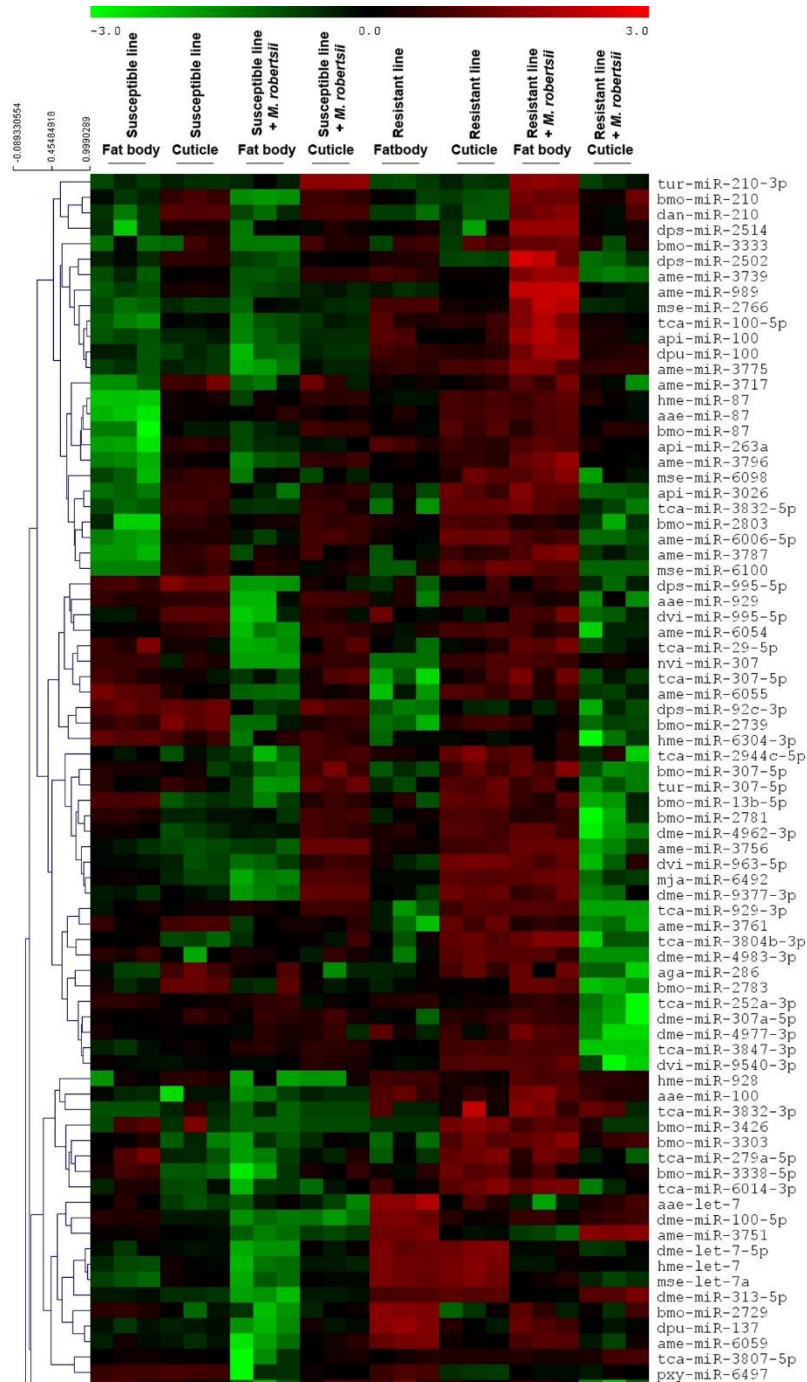

Supplementary Fig. S1. **Comparative expression profiling of selected miRNAs in infected/uninfected resistant and susceptible *G. mellonella* larvae.** The microarray heat map was generated following microarray hybridization, statistical analysis and hierarchical clustering. The heat map highlights a set of differentially-expressed miRNAs between fat body and cuticle of uninfected and infected susceptible and resistant lines with red showing upregulated genes and green showing downregulated genes. The log score of each fold change is indicated.

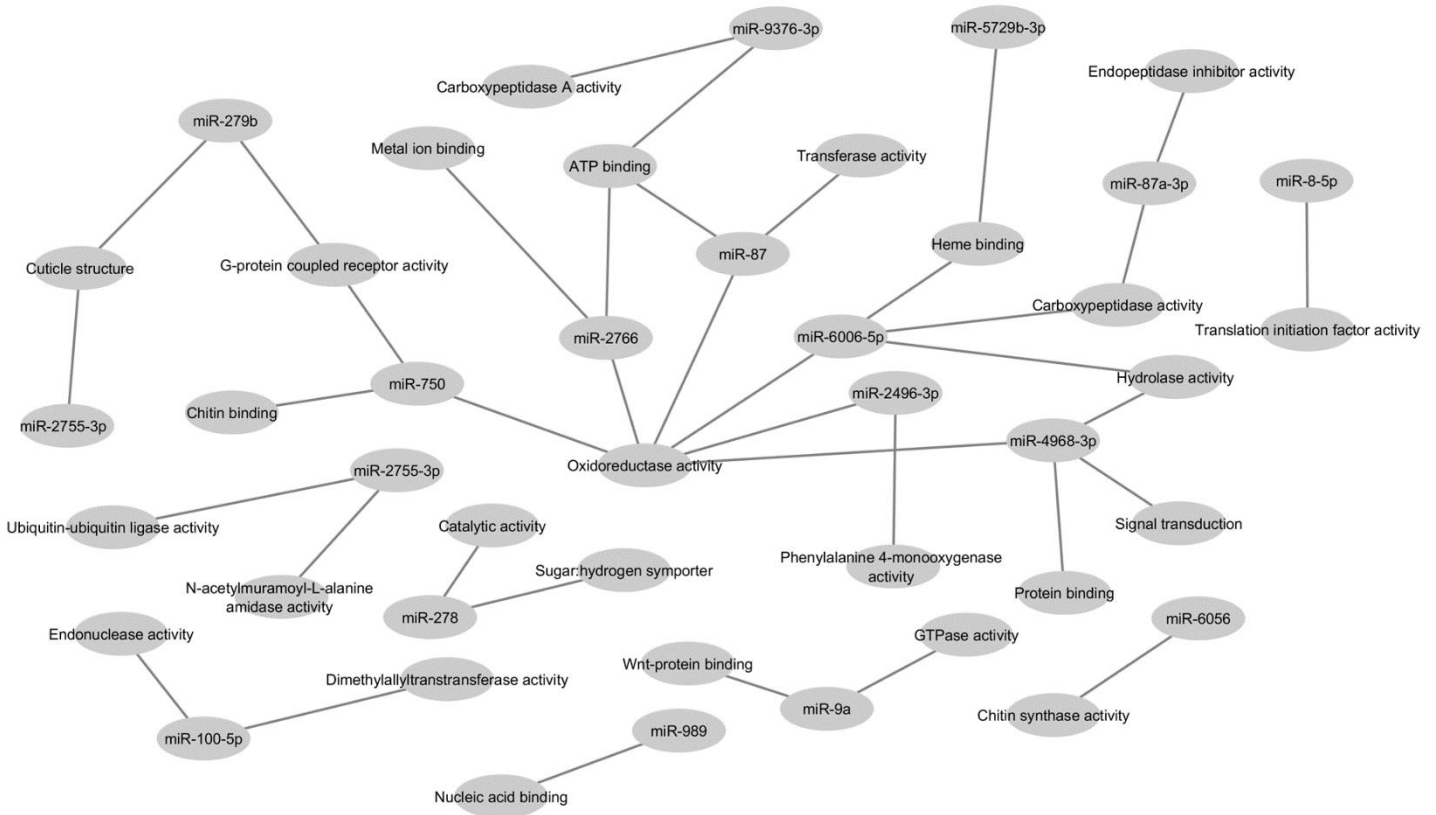

Supplementary Fig. S2. **The molecular functions targeted by miRNAs in *G. mellonella*.** The network diagram generated with Cytoscape shows molecular functions in infected/uninfected resistant and susceptible larvae that are targeted by differentially-expressed miRNA sequences obtained from miRBase. Connecting lines (edges) are used to indicate miRNA targets identified in this study by consulting Gene Ontology terms related to *G. mellonella* transcriptome sequences<sup>29</sup> and the UniProt database.

Supplementary Table S3: miRNA target prediction by RNAhybrid

|                                                                                                                                                               | Predicted mRNA-miRNA helix                                                                                       |
|---------------------------------------------------------------------------------------------------------------------------------------------------------------|------------------------------------------------------------------------------------------------------------------|
| Target:<br>contig16200_1.r1.exp<br>length: 1856<br>miRNA : dme-miR-4968-3p<br>length: 22<br>mfe: -27.1 kcal/mol<br>p-value: 1.000000e+00<br>position 1497     | target 5' A U 3'<br>UGUUGUUGCUGCU<br>ACGACGACGACGA<br>miRNA 3' AG CAACGAC 5'                                     |
| Target: contig21563_1.exp<br>length: 2106<br>miRNA : dme-miR-4968-3p<br>length: 22<br>mfe: -26.6 kcal/mol<br>p-value: 1.000000e+00<br>position 1901           | target 5' A A A CUUUUUUCAACCA AC A 3'<br>UC GC GCU GU GCUGUUGCUG<br>AG CG CGA CG CGACAACGAC<br>miRNA 3' A A A 5' |
| Target: GME-<br>string_Contig_6635.0<br>length: 1148<br>miRNA : dme-miR-4968-3p<br>length: 22<br>mfe: -23.3 kcal/mol<br>p-value: 1.000000e+00<br>position 989 | target 5' U ACACUUUACAAUUU GUAAUUG A 3'<br>UUUUGUUGCUGU UGU UGC<br>AGACGACGACG ACG ACG<br>miRNA 3' ACA AC 5'     |
| Target: contig17067_1.exp<br>length: 1402<br>miRNA : dme-miR-4968-3p<br>length: 22<br>mfe: -17.6 kcal/mol<br>p-value: 1.000000e+00<br>position 1377           | target 5' A A 3'<br>UGUUGCUG<br>ACGACGAC<br>miRNA 3' AGACGACG AACGAC 5'                                          |
| Target:<br>contig01373_1.f1.exp<br>length: 1537<br>miRNA : isc-miR-278<br>length: 22<br>mfe: -23.7 kcal/mol<br>p-value: 1.000000e+00<br>position 1295         | target 5' U C U AG A 3'<br>GAAUGGA CGA GAU CACC<br>UUUGCCU GCU UUA GUGG<br>miRNA 3' U GG CU 5'                   |
| Target:<br>contig21748_1.f1.exp<br>length: 2636<br>miRNA : isc-miR-278<br>length: 22<br>mfe: -12.2 kcal/mol<br>p-value: 1.000000e+00<br>position 2410         | target 5' A UC UG U 3'<br>ACG AUUCU U<br>UGC UAGGG G<br>miRNA 3' UUUGCC UUU UG CU 5'                             |
| Target: GME-<br>string_Contig_1981.0<br>length: 3279<br>miRNA : mse-miR-2766<br>length: 22<br>mfe: -4.5 kcal/mol                                              | target 5' G A 3'<br>UAU<br>GUG<br>miRNA 3' UGG GUAAGCUGUUCUGACU 5'                                               |

|                                                                                                                                                          |                                                                                                        |
|----------------------------------------------------------------------------------------------------------------------------------------------------------|--------------------------------------------------------------------------------------------------------|
| p-value: 1.000000e+00<br>position 3109                                                                                                                   |                                                                                                        |
| Target:<br>contig20381_1.fl.exp<br>length: 2170<br>miRNA : mse-miR-2766<br>length: 22<br>mfe: -22.3 kcal/mol<br>p-value: 1.000000e+00<br>position 1941   | target 5' G CAU UAU A 3'<br>UCAUUA UUUG UAAGACUGA<br>GGUGGU AAGC GUUCUGACU<br>miRNA 3' UG U 5'         |
| Target: contig15219_1.exp<br>length: 1022<br>miRNA : mse-miR-2766<br>length: 22<br>mfe: -17.2 kcal/mol<br>p-value: 1.000000e+00<br>position 875          | target 5' G G AA G UCA A 3'<br>AUU A AU UG AAGACUGA<br>UGG U UA GC UUCUGACU<br>miRNA 3' G GG A UG 5'   |
| Target:<br>contig16750_1.fl.exp<br>length: 2464<br>miRNA : mse-miR-2766<br>length: 22<br>mfe: -20.0 kcal/mol<br>p-value: 1.000000e+00<br>position 2366   | target 5' G G GG U GCCAA U 3'<br>U CACU UG ACA AGACUGA<br>G GUGG GC UGU UCUGACU<br>miRNA 3' U G UAA 5' |
| Target:<br>contig19310_1.fl.exp<br>length: 3464<br>miRNA : dme-miR-100-5p<br>length: 22<br>mfe: -21.3 kcal/mol<br>p-value: 1.000000e+00<br>position 3042 | target 5' G U CCAA G 3'<br>AUGA UUC GUUUACGGGUU<br>UGUU AAG UAAAUGCCCAA<br>miRNA 3' G C CC 5'          |
| Target:<br>contig20454_1.fl.exp<br>length: 2044<br>miRNA : dme-miR-100-5p<br>length: 22<br>mfe: -16.8 kcal/mol<br>p-value: 1.000000e+00<br>position 1723 | target 5' A A 3'<br>UACGGGU<br>AUGCCCA<br>miRNA 3' GUGUUCAAGCCUAA A 5'                                 |
| Target: contig02833_1.exp<br>length: 1232<br>miRNA : bmo-miR-87<br>length: 21<br>mfe: -18.3 kcal/mol<br>p-value: 1.000000e+00<br>position 765            | target 5' G CU A 3'<br>UGAAG UUUGCUGA<br>ACUUU AAACGAGU<br>miRNA 3' UGUGUGG C 5'                       |
| Target: contig02824_1.exp<br>length: 686<br>miRNA : bmo-miR-87<br>length: 21<br>mfe: -15.2 kcal/mol<br>p-value: 1.000000e+00<br>position 593             | target 5' A UUA UU U 3'<br>GC ACUU UUUGCUC<br>UG UGGA AAACGAG<br>miRNA 3' UG CUUUC U 5'                |

|                                                                                                                                                                |                                                                                                 |
|----------------------------------------------------------------------------------------------------------------------------------------------------------------|-------------------------------------------------------------------------------------------------|
| Target: GME-<br>string_Contig_374.0<br>length: 1081<br>miRNA : bmo-miR-87<br>length: 21<br>mfe: -17.8 kcal/mol<br>p-value: 1.000000e+00<br>position 951        | target 5' C UG UAUAAUCUACU A 3'<br>U UUGA UUUGCUCU<br>G GACU AAACGAGU<br>miRNA 3' UGU UG UUC 5' |
| Target: GME-<br>string_Contig_1571.0<br>length: 1437<br>miRNA : pxy-miR-9a<br>length: 21<br>mfe: -14.1 kcal/mol<br>p-value: 1.000000e+00<br>position 1100      | target 5' C AAA U 3'<br>AC UAGCUUUG<br>UG AUCGAAAU<br>miRNA 3' UUGAGGCCAU G 5'                  |
| Target: GME-<br>string_Contig_3530.0<br>length: 2186<br>miRNA : pxy-miR-9a<br>length: 21<br>mfe: -15.2 kcal/mol<br>p-value: 1.000000e+00<br>position 1564      | target 5' A G U 3'<br>UAAUC UAGCUUU<br>AUUGG AUCGAAA<br>miRNA 3' UUGAGGCC U 5'                  |
| Target:<br>contig19490_1.fl.exp<br>length: 2513<br>miRNA : pxy-miR-9a<br>length: 21<br>mfe: -17.0 kcal/mol<br>p-value: 1.000000e+00<br>position 1927           | target 5' U AA UUU A 3'<br>AUUC GUAGC CUAGU<br>UGAG CAUUG GAUCG<br>miRNA 3' U GC AAAU 5'        |
| Target: GME-<br>string_Contig_1493.0<br>length: 2344<br>miRNA : ame-miR-6006-5p<br>length: 19<br>mfe: -23.3 kcal/mol<br>p-value: 1.000000e+00<br>position 2002 | target 5' A GA C 3'<br>UCUU UCCCAGUUUU<br>AGAG AGGGUCAUA<br>miRNA 3' GG AGA 5'                  |
| Target: contig21833_1.exp<br>length: 1869<br>miRNA : ame-miR-6006-5p<br>length: 19<br>mfe: -14.9 kcal/mol<br>p-value: 1.000000e+00<br>position 1792            | target 5' A ACAAGAA C 3'<br>CU CCAGUUA<br>GA GGUCAAU<br>miRNA 3' G GAGAGAAG A 5'                |
| Target:<br>contig16741_1.fl.exp<br>length: 1825<br>miRNA : ame-miR-6006-5p<br>length: 19<br>mfe: -17.0 kcal/mol<br>p-value: 1.000000e+00<br>position 1042      | target 5' A U U 3'<br>UUC CCAGUUUU<br>AAG GGUCAUA<br>miRNA 3' GGAGAGAG 5'                       |



### **Insect rearing and selection**

The experimental and stock populations of *G. mellonella* were reared in strict isolation at 28°C, 60% relative humidity, with a 12:12h light:dark cycle, and fed on artificial medium (AM) containing 22.5% corn meal, 12.5% honey, 12.5% glycerol, 12.5% beeswax, 10% wheat flour, 12.5% milk solids, 5% yeast and 12.5% water. At the start of the artificial selection procedure, the laboratory insect population was split into two separate lines. Imagoes (100 males; 100 females) were placed in a 10L plastic tank at 28 °C in the dark to lay eggs on AM. One line was then subjected to selection (Selected line, S) and the second was left as the non-selected line (NS). At least 1000 5<sup>th</sup> instar larvae were used for selection for each of the first three generations followed by at least 400 larvae for subsequent selections. In each selection cycle, 400 S-line larvae were infected by  $1 \times 10^7$  *M. robertsii* conidia to establish a mycosis (LC<sub>40-50</sub>). The NS line insects were always kept under fungus-free conditions. To initiate the S-line next generation, 200 of the surviving larvae were collected and allowed to breed. This number of insects per population is enough to reduce the risks of inbreeding and genetic drift<sup>1</sup>. Two hundred uninfected NS-line insects (of exactly the same age as those used for the S-line) were also collected and allowed to breed. The experiment was continued for 6 generations.

### **Fungus cultivation**

*M. robertsii* (strain MB-1) was isolated from soil in Novosibirsk region (West Siberia) at 2009 year<sup>2</sup>. Fungi were grown on Sabouraud's dextrose agar (SDA) at 25°C for 14 d. Conidia were harvested by scraping from sporulating cultures, air-dried at RT for 1 week and stored at 4°C. For topical infections, conidia were suspended in sterile 0.03% Tween-80 and vortexed for 1 min. Viability of conidia was verified by incubation of these propagules on SDA and determining the percentage germination. Only suspensions with at least 99% germination were used.



## **Fungal infections**

Each insect was dipped in an aqueous suspension of the *M. robertsii* for 10 s using a concentration of  $1 \times 10^7$  conidia / ml. Dipped insects were kept in Petri dishes (10 larvae / dish) until sacrificed. The uninfected control insects were dipped into distilled water (n=60). Larvae were observed daily for (up to pupation) 10 days. All dead animals were removed and examined to confirm the cause of death. All animals used in these experiments were 5<sup>th</sup> instar larvae raised in the same cohort. The experiment was repeated independently three times. The total number of individuals used from each line was 300.

## **References**

1. Roy, B. A. & Kirchner, J. W. Evolutionary dynamics of pathogen resistance and tolerance. *Evolution* **54**, 51-63 (2000).
2. Kryukov, V. et al. Ecological preferences of *Metarhizium* spp. from Russia and neighboring territories and their activity against Colorado potato beetle larvae. *Journal of Invertebrate Pathology* **149**, 1-7 (2017). <http://dx.doi.org/10.1016/j.jip.2017.07.001>

**Step by step target prediction technique**

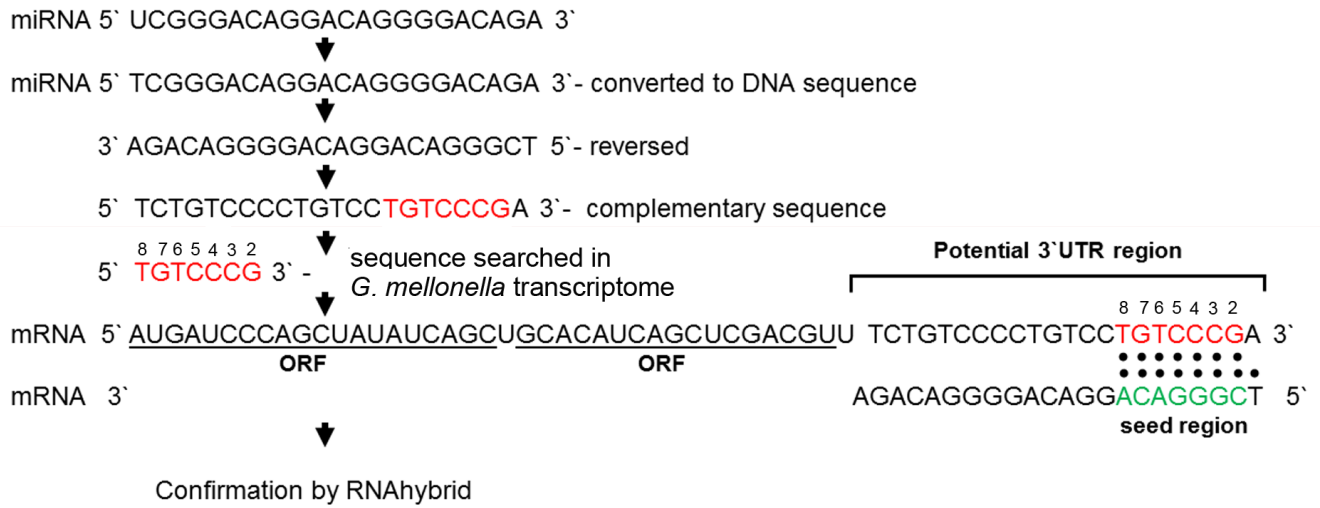

Supplementary Fig. S3. **Schematic illustration of the strategy for predicting miRNA targets using *G. mellonella* transcriptome.**

Supplementary table S4: GO terms of the identified mRNA targets of miRNAs

| <b>MicroRNA</b> | <b>Target</b>            | <b>Molecular function</b>                             | <b>Biological process</b>          |
|-----------------|--------------------------|-------------------------------------------------------|------------------------------------|
| dme-miR-4968-3p | Contig21563_1.exp        | Calcium channel activity                              | ER calcium ion homeostasis         |
| dme-miR-4968-3p | Contig16200_1.r1.exp     | Protein binding                                       |                                    |
| dme-miR-4968-3p | GME-string_Contig_6635.0 | Thiol oxidase activity                                |                                    |
| dme-miR-4968-3p | Contig17067_1.exp        | Hydrolase activity                                    | Lipid catabolic process            |
| dme-miR-9376-3p | Contig15458_1.f1.exp     | ATP binding; protein serine/threonine kinase activity | Protein amino acid phosphorylation |

|                 |                          |                                        |                              |
|-----------------|--------------------------|----------------------------------------|------------------------------|
| dme-miR-9376-3p | GME-string_Contig_1591.0 | Carboxypeptidase A activity            | Proteolysis                  |
| isc-miR-278     | Contig01373_1.f1.exp     | Sugar:hydrogen symporter activity      | Carbohydrate transport       |
| isc-miR-278     | Contig21748_1.f1.exp     | Catalytic activity                     | Metabolic process            |
| mse-miR-2766    | GME-string_Contig_1981.0 | Oxidoreductase activity                |                              |
| mse-miR-2766    | Contig20381_1.f1.exp     | Metal ion binding                      |                              |
| mse-miR-2766    | Contig15219_1.exp        |                                        | Response to stress           |
| mse-miR-2766    | Contig16750_1.f1.exp     | ATP binding                            | Protein folding              |
| dme-miR-100-5p  | Contig19310_1.f1.exp     | Endonuclease activity                  | Nucleotide-excision repair   |
| dme-miR-100-5p  | Contig20454_1.f1.exp     | Dimethylallyltranstransferase activity | Steroid biosynthetic process |

|                 |                          |                                                         |                                     |
|-----------------|--------------------------|---------------------------------------------------------|-------------------------------------|
| dme-miR-100-5p  | Contig15219_1.exp        |                                                         | Response to stress                  |
| bmo-miR-87      | Contig02833_1.exp        | ATP binding                                             | Protein folding                     |
| bmo-miR-87      | Contig19596_1.exp        | Transferase activity,<br>transferring hexosyl<br>groups | Metabolic process                   |
| bmo-miR-87      | Contig02824_1.exp        | Protein disulfide<br>oxidoreductase activity            | Glycerol ether<br>metabolic process |
| bmo-miR-87      | GME-string_Contig_374.0  |                                                         | Juvenile hormone<br>binding         |
| pxy-miR-9a      | GME-string_Contig_3530.0 |                                                         | Proteolysis                         |
| pxy-miR-9a      | Contig19490_1.f1.exp     | Wnt-protein binding                                     | Wnt signaling<br>pathway            |
| pxy-miR-9a      | GME-string_Contig_1571.0 | GTPase activity                                         | Protein transport                   |
| ame-miR-6006-5p | GME-string_Contig_1493.0 |                                                         | Transport                           |

|                     |                          |                                                    |                                       |
|---------------------|--------------------------|----------------------------------------------------|---------------------------------------|
| ame-miR-<br>6006-5p | Contig21424_1.exp        | Hydrolase activity                                 | Metabolic process                     |
| ame-miR-<br>6006-5p | Contig21833_1.exp        | Heme binding                                       | Electron transport                    |
| ame-miR-<br>6006-5p | Contig16741_1.f1.exp     | Oxidoreductase activity                            | Fatty acid<br>biosynthetic<br>process |
| ame-miR-<br>6006-5p | GME-string_Contig_6193.0 | Serine-type<br>carboxypeptidase<br>activity        | Proteolysis                           |
| tca-miR-<br>87a-3p  | Contig00467_1.f1.exp     | Serine-type<br>carboxypeptidase<br>activity        | Proteolysis                           |
| tca-miR-<br>87a-3p  | Contig02728_1.f1.exp     | Serine-type<br>endopeptidase inhibitor<br>activity |                                       |
| ame-miR-<br>750     | Contig01077_1.exp        | Oxidoreductase activity                            |                                       |

|                  |                          |                                        |                                         |
|------------------|--------------------------|----------------------------------------|-----------------------------------------|
| ame-miR-750      | Contig15746_1.exp        | G-protein coupled receptor activity    | Cell surface receptor signaling pathway |
| ame-miR-750      | Contig02423_1.exp        | Chitin binding                         | Carbohydrate metabolic process          |
| mse-miR-989      | GME-string_Contig_4453.0 | Nucleic acid binding                   |                                         |
| mse-miR-989      | Contig03221_1.exp        |                                        | Proteolysis                             |
| dme-miR-2496-3p  | Contig00345_1.exp        | Phenylalanine 4-monooxygenase activity | L-phenylalanine catabolic process       |
| dme-miR-2496-3p  | Contig14976_1.exp        | Oxidoreductase activity                |                                         |
| ame-miR-6056     | Contig05033_1.exp        | Chitin synthase activity               | Chitin biosynthetic process             |
| tur-miR-5729b-3p | Contig18067_1.r1.exp     | Heme binding                           |                                         |

|                     |                          |                                                 |                                                                   |
|---------------------|--------------------------|-------------------------------------------------|-------------------------------------------------------------------|
| api-miR-<br>279b    | Contig02910_2.r1.exp     | G-protein coupled<br>receptor activity          | Cell surface<br>receptor signaling<br>pathway                     |
| api-miR-<br>279b    | GME-string_Contig_1151.0 | Structural constituent of<br>cuticle            |                                                                   |
| api-miR-<br>279b    | Contig20024_1.f1.exp     |                                                 | Cell redox<br>homeostasis                                         |
| bmo-miR-<br>2755-3p | GME-string_Contig_1310.0 | Structural constituent of<br>cuticle            |                                                                   |
| bmo-miR-<br>2755-3p | GME-string_Contig_3363.0 | Ubiquitin-ubiquitin<br>ligase activity          | Ubiquitin-<br>dependent protein<br>catabolic process              |
| bmo-miR-<br>2755-3p | Contig02387_1.f1.exp     | N-acetylmuramoyl-L-<br>alanine amidase activity | Peptidoglycan<br>catabolic process                                |
| dme-miR-<br>8-5p    | GME-string_Contig_1938.0 | Translation initiation<br>factor activity       | Transcription<br>initiation from<br>RNA polymerase<br>II promoter |
